# Supplementary material for: Curriculum guide for teaching house officers and faculty: applying procedure codes effectively using chemical denervation as a model
Source: Frontiers journal article supplement (doi:10.3389/fmed.2024.1359230), 2024-09-18
Supplement: Data_Sheet_1.PDF [file Data_Sheet_1.PDF]

What do you know about billing and coding for Chemodenervation toxin procedures?

What billing codes would you typically use for denervation procedures.

When considering practice management in medicine what knowledge gaps do you have with CPT codes, J codes, modifiers?

# Pre- test

- When do you use Modifier 50? \_\_\_\_\_
- Name a muscle that can be considered as UE and trunk muscle when coding. \_\_\_\_\_
- True or false: More than one guidance type can be assigned to a claim \_\_\_\_\_

| CPT description w/ wRVU                                                                                           | Modifier<br>50 | Modifier<br>26 |
|-------------------------------------------------------------------------------------------------------------------|----------------|----------------|
| <b>64642</b> <u>PC- Chemodenervation of ONE extremity: 1-4 muscle(s)</u><br>RVW 1.65                              | n/a            | yes            |
| <b>64643</b> <u>PC- Chemodenervation of ONE extremity, each additional extremity: 1-4 muscle(s)</u> RVW 1.22      | n/a            | yes            |
| <b>64644</b> <u>PC- Chemodenervation of ONE extremity: 5 or more muscle(s)</u> RVW 1.82                           | n/a            | yes            |
| <b>64645</b> <u>PC- Chemodenervation of ONE extremity: each additional extremity 5 or more muscle(s)</u> RVW 1.65 | n/a            | yes            |
| <b>HIGHLIGHTED are BASE CODES</b>                                                                                 |                |                |

| CPT description w/ wRVU                                                                                              | Modifier<br>50 | Modifier<br>26 |
|----------------------------------------------------------------------------------------------------------------------|----------------|----------------|
| <b>64612</b> <u>PC- Chemodenervation</u> of facial nerve unilateral RVW 1.41                                         | yes            | yes            |
| <b>64615</b> <u>PC- Chemodenervation</u> of facial/trigeminal/cervical muscle migraine ( <b>Bilateral</b> ) RVW 1.85 | no             | yes            |
| <b>64616</b> <u>PC- Chemodenervation</u> of neck muscle(s)/excluding larynx ( <b>Unilateral</b> ) RVU 1.53           | yes            | yes            |
|                                                                                                                      |                |                |
|                                                                                                                      |                |                |
|                                                                                                                      |                |                |

## Guidance: A Professional Charge

## Modifier

|                                                                    |     |
|--------------------------------------------------------------------|-----|
| Visual/palpation only. No guidance charge                          | n/a |
| <b>95873</b> PC Electric Stimulation Guidance for Chemodenervation | 26  |
| <b>95874</b> PC Needle EMG Guidance for Chemodenervation           | 26  |
| <b>76942</b> PC Ultrasound Guidance for Chemical Denervation       | 26  |

| Trunk muscle (s) Chemodenervation |                                               |          |
|-----------------------------------|-----------------------------------------------|----------|
| 64646                             | PC Chemodenervation Trunk muscle(s):1-5       | 1.8 RVW  |
| 64647                             | PC Chemodenervation Trunk muscle(s):6 or more | 2.11 RVW |

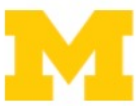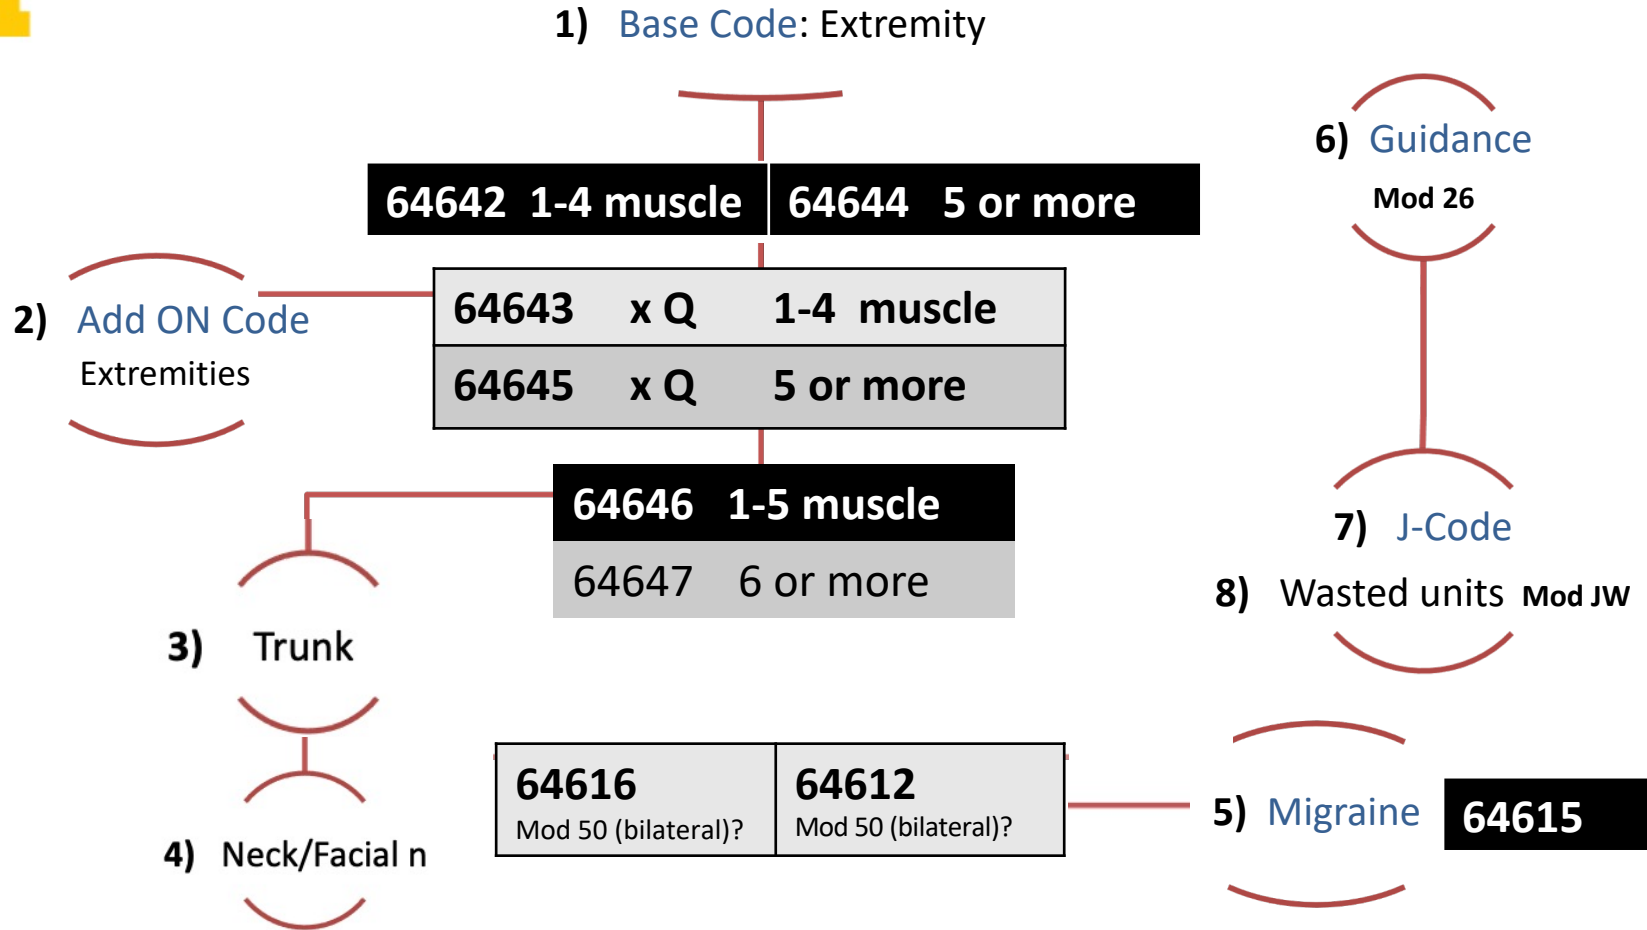

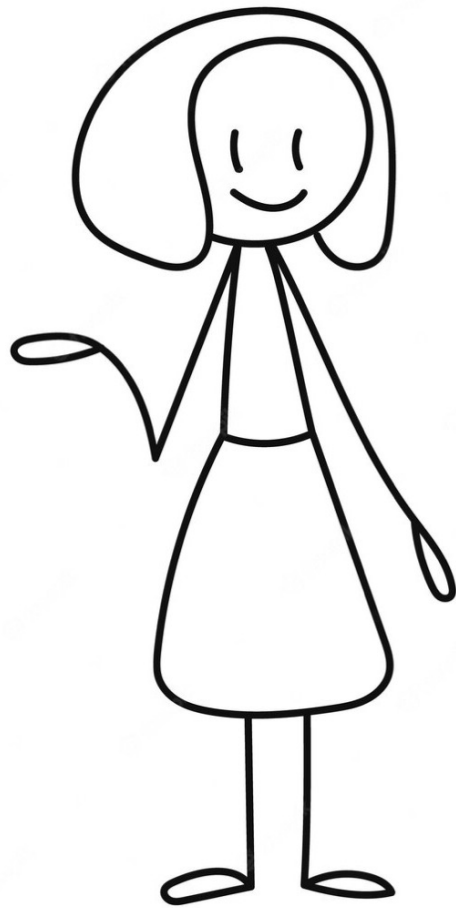

**Case 1:**

100 units of IncobotulinumToxinA was diluted using 4 cc of preservative free saline. E-stim was used to localize muscles. 50 units were injected into right adductor magnus (50U), (25U) in the Adductor Longus and (50U) in the left adductor Magnus.

**How do we code this?** Please place markings on figure for where injected.



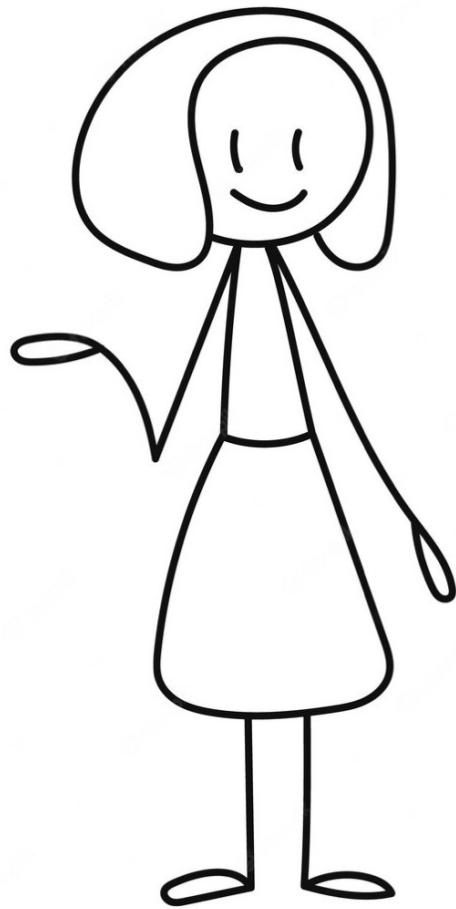

Base Code:

Add On Code:

Trunk

Neck/ facial n

Migraine

Guidance

J code:

Wasted units



**Case 2:** 200 units of OnaBotuliumtoxinA was prepared with dilution with 4 cc Normal Saline. Lower extremity chemodenervation is unchanged. **Please trace screen for markings on these muscles. How do we code this?**

|                     |              |              |
|---------------------|--------------|--------------|
| Corrugator          | 5            | 5            |
| Procerus            | 5            |              |
| Frontalis           | 10 (2 sites) | 10 (2 sites) |
| Temporalis          | 20 (4 sites) | 20 (4 sites) |
| Occipitalis         | 15 (3 sites) | 15 (3 sites) |
| Trapezius           | 15 (3 sites) | 15 (3 sites) |
| Cervical paraspinal | 10 (2 sites) | 10 (2 sites) |



Base Code:

Add On Code:

Trunk

Neck/ facial n

Migraine

Guidance

J code:

Wasted units

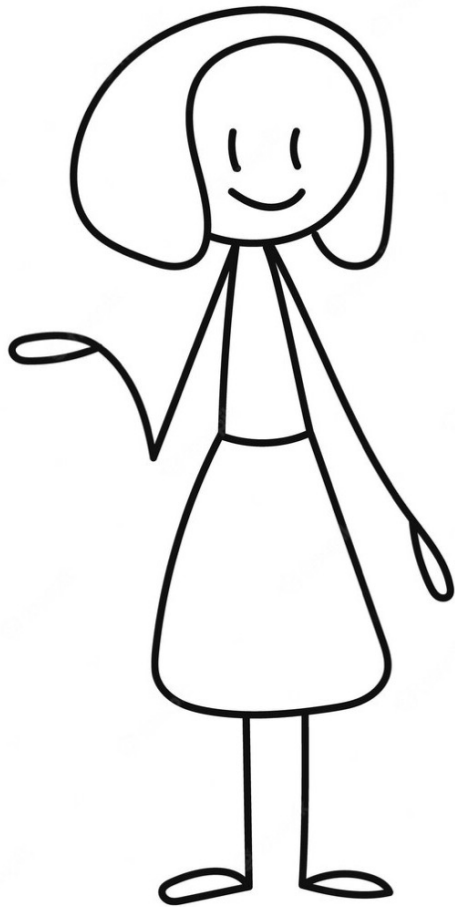

### Case 3

Amanda suffers a left MCA stroke with right hemiparesis with pain due to tone.

\*E-Stim guidance for her Upper extremity:

Pronator Teres (20U) FDP (20U), FDS (20U), brachialis (20U), FPL(10).

\*US guidance for her Lower Extremity:

Gastrocnemius medial and lateral head (25U each), soleus (25U), posterior tibialis (25U) as well as her baseline adductor tone bilaterally (50U).

You dilute 300 units with 6cc preservative free saline of Onabotulinumtoxin A.

**Place markings where injected. How would you code this procedure?**

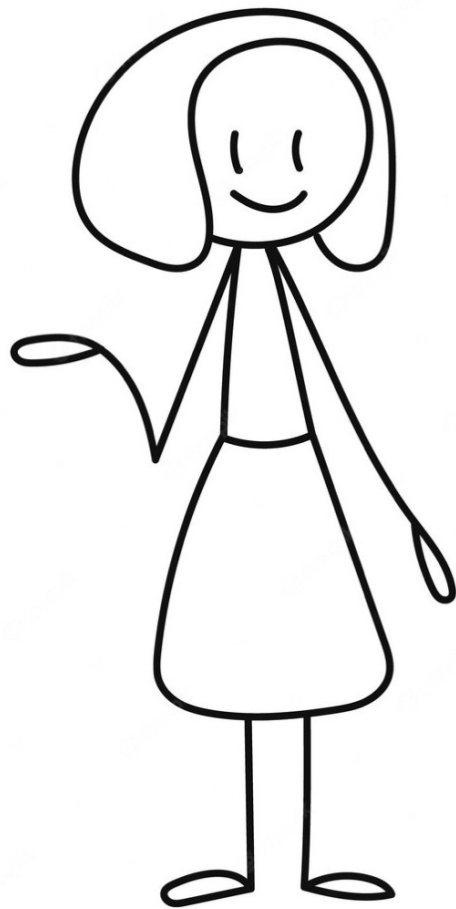

Base Code:

Add On Code:

Trunk

Neck/ facial n

Migraine

Guidance

J code:

Wasted units

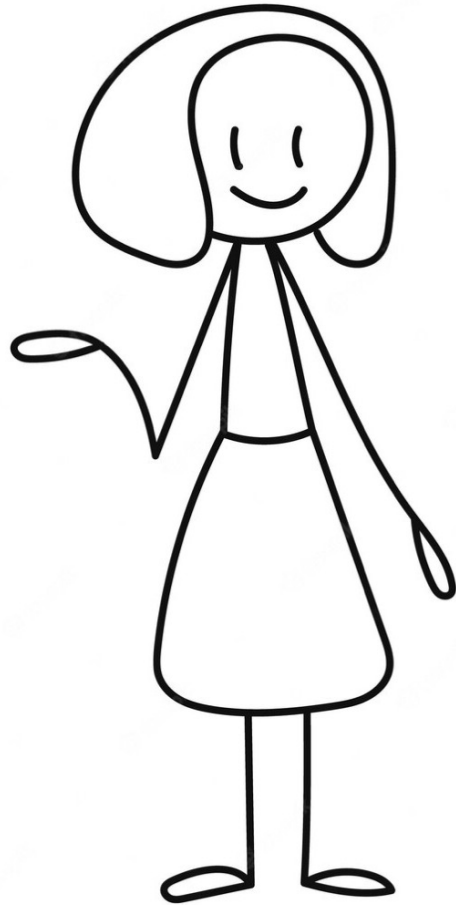

**Case 4:** Lura is a patient with C3 ASIA A Vent dependent SCI with TBI that is noted to have her head constantly turned to the right with her chin flexed into her body with shoulder adduction. This position causes pain and skin irritation underneath the chin and on the chest with a stage 2 pressure injury.

You elect to use EMG for guidance to inject her bilateral SCM (left 30 units, right 20 units, bilateral scalenes (15 units) and left pectoralis m (20 units) with Onabotulinumtoxin A. You dilute 100 units with 4cc preservative free saline.

**Please place markings where injected. How would you code this?**



Base Code:

Add On Code:

Trunk

Neck/ facial n

Migraine

Guidance

J code:

Wasted units

# Post test

- When do you use Modifier 50? \_\_\_\_\_
- Name a muscle that can be considered as UE and trunk. \_\_\_\_\_
- True or false: More than one guidance type can be assigned to a claim \_\_\_\_\_



Which parts of the course were most effective in increasing your understanding of CPT billing procedures?

In what ways do you think this information will aid you in practice management?

How will you change your approach to appropriately applying CPT to denervation injections? What impact do you think this lesson will have in your approach to billing and coding in practice management overall?
